1 The impact of climate suitability,  
2 urbanisation, and connectivity on the  
3 expansion of dengue in 21st century  
4 Brazil

5  
6 Sophie A. Lee<sup>1,2\*</sup>, Theo Economou<sup>3</sup>, Rafael de Castro Catão<sup>4</sup>, Christovam Barcellos<sup>5</sup>, Rachel  
7 Lowe<sup>1,2,6</sup>

8  
9  
10 <sup>1</sup> Centre for Mathematical Modelling of Infectious Diseases, London School of Hygiene &  
11 Tropical Medicine, London, UK

12 <sup>2</sup> Centre on Climate Change and Planetary Health, London School of Hygiene & Tropical  
13 Medicine, London, UK

14 <sup>3</sup> Climate and Atmosphere Research Centre, The Cyprus Institute, Nicosia, Cyprus

15 <sup>4</sup> Departamento de Geografia, Universidade Federal do Espírito Santo, Vitoria, Brazil

16 <sup>5</sup> Fundação Oswaldo Cruz, Rio de Janeiro, Brazil

17 <sup>6</sup> Barcelona Supercomputing Center, Barcelona, Spain

18  
19 \* Corresponding author

20 E-mail: [sophie.a.lee10@gmail.com](mailto:sophie.a.lee10@gmail.com)

21

## 22 Abstract

23 Dengue is hyperendemic in Brazil, with outbreaks affecting all regions. Previous studies  
24 identified geographical barriers to dengue transmission in Brazil, beyond which certain areas,  
25 such as South Brazil and the Amazon rainforest, were relatively protected from outbreaks.  
26 Recent data shows these barriers are being eroded. In this study, we explore the drivers of  
27 this expansion and identify the current limits to the dengue transmission zone. We used a  
28 spatio-temporal additive model to explore the associations between dengue outbreaks and  
29 temperature suitability, urbanisation, and connectivity to the Brazilian urban network. The  
30 model was applied to a binary outbreak indicator, assuming the official threshold value of 300  
31 cases per 100,000 residents, for Brazil's municipalities between 2001 and 2020. We found a  
32 nonlinear relationship between higher levels of connectivity to the Brazilian urban network  
33 and the odds of an outbreak, with lower odds in metropolises compared to regional capitals.  
34 The number of months per year with suitable temperature conditions for *Aedes* mosquitoes  
35 was positively associated with the dengue outbreak occurrence. Temperature suitability  
36 explained most interannual and spatial variation in South Brazil, confirming this geographical  
37 barrier is influenced by lower seasonal temperatures. Municipalities that had experienced an  
38 outbreak previously had double the odds of subsequent outbreaks, indicating that dengue  
39 tends to become established in areas after introduction. We identified geographical barriers  
40 to dengue transmission in South Brazil, western Amazon, and along the northern coast of  
41 Brazil. Although a southern barrier still exists, it has shifted south, and the Amazon no longer  
42 has a clear boundary. Few areas of Brazil remain protected from dengue outbreaks.  
43 Communities living on the edge of previous barriers are particularly susceptible to future

44 outbreaks as they lack immunity. Control strategies should target regions at risk of future  
45 outbreaks as well as those currently within the dengue transmission zone.

46

47

## 48 [Author summary](#)

49 Dengue is a mosquito-borne disease that has expanded rapidly around the world due to  
50 increased urbanisation, global mobility and climate change. In Brazil, geographical barriers to  
51 dengue transmission exist, beyond which certain areas including South Brazil and the Amazon  
52 rainforest are relatively protected from outbreaks. However, we found that the previous  
53 barrier in South Brazil has shifted further south as a result of increased temperature suitability.  
54 The previously identified barrier protecting the western Amazon no longer exists. This is  
55 particularly concerning as we found dengue outbreaks tend to become established in areas  
56 after introduction. Highly influential cities with many transport links had increased odds of an  
57 outbreak. However, the most influential cities had lower odds of an outbreak than cities  
58 connected regionally. This study highlights the importance of monitoring the expansion of  
59 dengue outbreaks and designing disease prevention strategies for areas at risk of future  
60 outbreaks as well as areas in the established dengue transmission zone.

61

62

## 63 Introduction

64 Dengue is considered one of the top 10 threats to global health (1), with around half the  
65 world's population living in areas at risk of infection (2). Incidence rates have doubled each  
66 decade in the past 30 years as a result of increased urbanisation, global mobility and climate  
67 change (2–4). All 4 dengue serotypes are endemic to Brazil, which experiences frequent  
68 outbreaks across the country (5). Previous studies identified geographical barriers to dengue  
69 transmission beyond which regions were relatively protected. This included South Brazil,  
70 where seasonal temperatures are too cold for vectors to efficiently transmit the virus, areas  
71 of high altitude in Southeast Brazil and remote regions of the western Amazon (6). However,  
72 these barriers are being eroded and the dengue transmission area in Brazil has expanded over  
73 the past decade. This expansion is thought to be linked to increased human mobility and  
74 changes in climate (7,8).

75

76 For dengue to become established in a new region, the environment must be suitable to  
77 support the propagation of the dengue vector, *Aedes* mosquitoes. There are two vectors  
78 present in Brazil capable of transmitting the dengue virus: *Aedes aegypti* and *Aedes*  
79 *albopictus*. Currently only *Aedes aegypti* are considered responsible for dengue transmission  
80 in Brazil (9,10), however a recent study identified *Aedes albopictus* infected by dengue virus  
81 in a rural area of Brazil during an outbreak, which could indicate their involvement in the  
82 introduction of dengue to rural areas (11). *Aedes aegypti* have evolved to live in urban  
83 environments close to humans (12) but there is evidence to suggest they are becoming  
84 established in peri-urban and rural regions of South America (13,14). Conversely, *Aedes*  
85 *albopictus* are typically found in peri-urban areas but have been identified in densely

86 urbanised areas such as urban slums in Brazil (9,15). *Aedes* mosquitoes breed in pools of  
87 standing, clean water created by water storage containers or uncollected refuse. These  
88 conditions arise when rapid urbanisation occurs without adequate improvements to  
89 infrastructure, such as access to piped water and refuse collection (16,17). There is evidence  
90 that areas lacking reliable access to piped water are more susceptible to dengue outbreaks,  
91 particularly in highly urbanised areas following drought (18). Suitable climate conditions are  
92 required for the mosquitoes to breed and transmit the virus. *Aedes aegypti* are unable to  
93 survive in temperatures below 10°C or above 40°C (19) and can only transmit the virus  
94 between 17.8° and 34.5°C (20,21). *Aedes albopictus* are more suited to cooler temperatures  
95 and can transmit the virus between 16.2° and 31.4°C (20,21). Recent outbreaks in temperate  
96 cities of South America have shown that epidemics are still possible in regions that experience  
97 seasonal temperatures outside of this range due to human movement (22–24).

98

99 The expansion of *Aedes aegypti* and the arboviruses they transmit into rural parts of the  
100 Amazon has been linked to connections to and within the area by air, road or boat (13,25).  
101 Despite this, the investigation of spatial connections created by human movement is little  
102 explored in the literature and the vast majority of spatial modelling studies of mosquito-borne  
103 diseases assume connectivity is based on distance alone (26). Brazilian cities are connected  
104 to one another within a complex urban network, described within the Regions of influence of  
105 cities ("Regiões de Influência das Cidades", REGIC) studies carried out by the Brazilian Institute  
106 of Geography and Statistics (27,28). People often travel great distances to reach large urban  
107 centres as they contain important educational, business or cultural institutions. Failure to  
108 account for long-distance movements may miss important drivers of dengue expansion,  
109 particularly in areas such as the Amazon where the average distance travelled to Manaus, the

110 capital of Amazonas state, was 316km. Important cities can have influence over vast areas of  
111 Brazil, for example the region of influence connected to the capital city of Brasilia corresponds  
112 to over 20% of the country and spans 1.8 million km<sup>2</sup> (28).

113

114 Although previous studies have shown the expansion of dengue outbreaks in Brazil (7) and  
115 the association between the dengue transmission zone and climate (6), neither formally  
116 investigated the link between this expansion and human movement. In this study, we use the  
117 level of influence of cities from the REGIC studies (27,28) as a proxy for human movement,  
118 and aim to better understand how climate suitability, connectivity between cities and  
119 socioeconomic factors have contributed to the recent expansion of dengue. It is hoped that  
120 by understanding the drivers of dengue expansion in Brazil, we can identify its spatial trends  
121 and regions at risk from future outbreaks.

122

## 123 [Methods](#)

### 124 [Epidemiological data](#)

125 Brazil is the 6th most populous country in the world with an estimated population of over 211  
126 million in 2020. The country can be separated into 5 distinct geo-political regions (Figure S1a),  
127 27 federal units (26 states and a federal district containing the capital city Brasilia, Figure S1b),  
128 and 5,570 municipalities. We obtained monthly notified dengue cases for each of Brazil's  
129 5,570 municipalities between January 2001 and December 2020 from Brazil's Notifiable  
130 Diseases Information System (SINAN), freely available via the Health Information  
131 Department, DATASUS (<http://www2.datasus.gov.br/DATASUS/index.php?area=0203>).  
132 Cases were aggregated by month of first symptom and municipality of residence. Dengue

133 cases are considered confirmed if they test positive in a laboratory or, more commonly, based  
134 on the Ministry of Health's syndromic definition. Between 2001 and 2020, municipality  
135 boundaries in Brazil have changed and several new municipalities were created. To ensure  
136 data were consistent over the study period, we aggregated data to the 5,560 municipalities  
137 that were present in 2001 by combining the new municipalities with their parent  
138 municipalities. The data and code used to aggregate the dengue case data are available from  
139 [https://github.com/sophie-a-lee/Dengue\\_expansion](https://github.com/sophie-a-lee/Dengue_expansion).

140

141

142 To understand how the dengue transmission zone has expanded between 2001 and 2020, we  
143 aggregated dengue cases by year and created a binary outbreak indicator. We used an  
144 outbreak threshold of more than 300 cases per 100,000 residents, defined as 'high risk' by  
145 the Brazilian Ministry of Health (29). We also tested a 'medium risk' indicator, defined as more  
146 than 100 cases per 100,000 residents. The annual dengue incidence rate was calculated using  
147 estimates of the annual population for each municipality obtained from the Brazilian Institute  
148 of Statistics and Geography (IBGE) via DATASUS  
149 (<http://tabnet.datasus.gov.br/cgi/defptohtm.exe?ibge/cnv/poptbr.def>). Further details about  
150 the dengue surveillance system in Brazil and outbreak definitions are given in the  
151 supplementary material.

152

153

#### 154 [Meteorological data](#)

155 Monthly mean temperatures (K) were obtained from the European Centre for Medium-Range  
156 Weather Forecasts' (ECMRWF) ERA5-Land dataset (30) for the period January 2001 -

157 December 2020, at a spatial resolution of  $0.1^\circ \times 0.1^\circ$  (~9km). The ERA5-Land database was  
158 chosen because of its fine spatial scale, necessary when analysing small administrative units  
159 such as municipalities. Temperatures were converted from Kelvin to degrees Celcius ( $^\circ\text{C}$ ) by  
160 subtracting 273.15. Mean temperature was aggregated to each municipality using the  
161 `exactextractr` package (31) in R (version 4.0.3) by calculating the mean of the grid boxes lying  
162 within each municipality. Grid boxes partially covered by a municipality were weighted by the  
163 percentage of area that lay within the municipality.

164

165 Due to its size, Brazil experiences a wide range of climate systems and ecosystems. The  
166 northern part of the country lies on or close to the equator, meaning regions experience year-  
167 round high temperatures. In contrast, the South and Southeast regions have clear seasonality  
168 in temperatures with cooler winters (Figure S2), often falling below the optimal temperature  
169 range for dengue transmission (between  $17.8^\circ\text{C}$  and  $34.5^\circ\text{C}$  for *Aedes aegypti* and  $16.2^\circ$  and  
170  $31.4^\circ\text{C}$  for *Aedes albopictus* (20,21)). To understand how temperature suitability has  
171 contributed to the expansion of the dengue transmission zone in Brazil, we calculated the  
172 number of months per year each municipality lay within the suitable temperature ranges  
173 (between  $16.2^\circ$  and  $34.5^\circ\text{C}$ ). Most of Brazil experiences year-round temperature suitability  
174 except for the temperate South and mountainous regions in the Southeast (Figure S3),  
175 although the number of months suitable has increased in these regions over the past decade  
176 (Figure 1). As *Aedes aegypti* is the only vector proven to transmit dengue in Brazil, we also  
177 tested the number of months considered suitable for *Aedes aegypti* transmission (between  
178  $17.8^\circ\text{C}$  and  $34.5^\circ\text{C}$ ) within the model.

179

180



181 **Fig 1: The difference between the average number of months with suitable temperatures**  
182 **for dengue transmission in 2001 - 2010 and 2011 - 2020.** The number of months with  
183 temperatures between 16.2 and 34.5°C has increased on average (shown in pink) in parts of  
184 South and Southeast Brazil which were previously considered 'protected' from dengue  
185 transmission.

186

187

## 188 Urbanisation

189 We obtained the percentage of residents in each municipality living in urban areas from the  
190 2000 and 2010 censuses via DATASUS. In 2010, just under 85% of Brazil's population lived in  
191 urban areas, mostly concentrated in the large cities of South and Southeast Brazil. The North  
192 region, except for some state capitals, has a larger rural population (Figure S4). The  
193 percentage of residents living in urban areas was converted to the proportion to make  
194 interpretation and comparison of model coefficients easier. Data from the 2000 census was  
195 used for the years 2001 - 2009 and data from 2010 was used for the years 2010 - 2020 to  
196 account for changes in urbanisation over the period. Further details on the socioeconomic  
197 variables considered in this analysis are given in the supplementary materials.

198

199

## 200 Hierarchical levels of influence of cities

201 As a proxy for human movement, we obtained the hierarchical level of influence of cities from  
202 IBGE's REGIC studies, carried out in 2007 and 2018 (27,28). REGIC aims to recreate the  
203 complex urban network of Brazil using information from surveys about the frequency and  
204 reasons for the movement of people and goods around the country. Part of this study

205 involved classifying cities based on their hierarchical level of influence within this network  
206 (see the supplementary materials for more details). Cities were classified into five levels:

207

208

209 1. Metropolis: the largest cities in Brazil, with strong connections throughout the entire  
210 country. This includes São Paulo, the capital Brasilia, and Rio de Janeiro.

211 2. Regional capital: large cities which are connected throughout the region in which they  
212 are located and to metropolises. This includes state capitals that were not classified as  
213 metropolises, such as Rio Branco, Campo Grande and Porto Velho.

214 3. Sub-regional capital: cities with a lower level of connectivity, mostly connected locally  
215 and to the three largest metropolises.

216 4. Zone centre: smaller cities with influences restricted to their immediate area, often  
217 neighbours.

218 5. Local centre: the smallest cities in the network which typically only serve residents of  
219 the municipality and are not connected elsewhere.

220

221

222 The REGIC study aggregated data to population concentration areas (“Áreas de Concentração  
223 de População”, ACPs), defined in (32). Smaller or isolated ACPs consisted of a single  
224 municipality, while large urban centres consisted of multiple municipalities. Levels of  
225 influence were extracted for each municipality based on the ACP they belonged to, meaning  
226 small municipalities neighbouring large cities may have a high level of influence. The  
227 distribution of highly connected urban centres is uneven across the country; the South and  
228 Southeast regions are particularly well connected, while the North and Northeast contain

229 fewer high-level centres (Figure 2, Table S1). To account for any changes in connectivity over  
230 the study period, we used the levels extracted from the 2007 study for the years 2001 - 2010,  
231 and levels from the 2018 study for the years 2011 - 2020.

232

233

234 **Fig 2: The level of influence of cities within the Brazilian urban network from REGIC 2018.**

235 The Amazon region is far less connected to the urban network than the rest of the country.

236 As there is only one metropolis in North Brazil, people often travel great distances, far greater  
237 than in other regions, to reach cities.

238

239 [Modelling approach](#)

240 We formulated a binomial spatio-temporal generalised additive model (GAM) using the  
241 binary outbreak indicator, defined as an annual dengue incidence rate of more than 300 cases  
242 per 100,000 residents, as the response variable. We included the number of months per year  
243 with temperature suitable for *Aedes* mosquitoes to transmit dengue, the level of influence  
244 from REGIC, the proportion of residents living in urban areas, and a 'prior outbreak' indicator  
245 which took the value 0 until the year of the first outbreak in a municipality and 1 in every year  
246 after as covariates. To account for spatial and temporal patterns in the data, smooth functions  
247 of the year and the coordinates of the centroids of municipalities were included in the model  
248 (see the supplementary materials for further details). Inference was performed using an  
249 empirical Bayesian approach with estimates calculated using restricted maximum likelihood  
250 (REML) as part of the *mgcv* package in R (33).

251

252

253 Model fit was assessed using a receiver operating characteristic (ROC) curve which plots the  
254 true positive rate against the true negative rate at different thresholds to test the predictive  
255 ability of the model. The area under the ROC curve was calculated as this gives a measure of  
256 predictive ability compared to chance, which would return a value of 0.5. To assess the  
257 relative contribution of the covariates, we compared the spatio-temporal structured residual  
258 terms between the final model and a baseline model, containing only the spatio-temporal  
259 smooth terms. If the covariates explained variation in the data, the smooth functions would  
260 shrink towards zero in the final model and the difference between the absolute estimates of  
261 these functions would be negative. To assess the contribution of the covariates over the  
262 entire period, we took the median difference for each municipality. The contribution of each  
263 individual covariate was also assessed by taking the difference between the structured  
264 residuals from the baseline model and models with each covariate added in turn.

265

266

## 267 Results

268 There were 13,860,348 cases of dengue notified between January 2001 and December 2020  
269 in Brazil. The dengue incidence rate has increased across all regions of the country (Figure 3)  
270 particularly in the Centre-West and Southeast. Outbreaks were more widespread since 2010  
271 with around 80% of all municipalities in the Centre-West now regularly experiencing  
272 outbreaks (Figure S8). Although the South had the highest incidence in 2020, this was still  
273 concentrated in a small number of municipalities in Paraná, around the fringe area of the  
274 previously identified geographical barrier. The previous barriers to dengue transmission have  
275 been eroded over the past decade. This is particularly noticeable in the western Amazon

276 where there are now very few municipalities yet to experience an outbreak. The erosion of  
277 the barrier in the South was particularly noticeable in 2020 when Paraná had the highest  
278 incidence rate of any state (Figure 4). We observed that once dengue was introduced to  
279 municipalities, the virus became established and future outbreaks were likely to occur (Figure  
280 5).

281

282

283 **Fig 3: Monthly incidence rate per 100,000 residents in regions of Brazil 2001 - 2020.**

284 Incidence rates have increased in every region of the country across the 21st century. The  
285 first regional outbreak occurred in 2010, outbreaks have occurred more frequently and in  
286 more regions since then.

287

288

289 **Fig 4: The first year each municipality experienced an outbreak for the first time in the**

290 **period 2001 - 2010 and 2001 - 2020.** The year each municipality first recorded over 300 cases  
291 per 100,000 residents. Recent data shows the previous barriers to dengue outbreaks in the  
292 Amazon and South are being eroded.

293

294

295

296 **Fig 5: The number of years each municipality experienced an outbreak between 2001 and**

297 **2020.** Municipalities that experienced outbreaks earlier in the 21st century continued to  
298 experience outbreaks throughout the period. This suggests that once dengue is introduced to  
299 a region, it becomes established.

300

301

## 302 [Model results](#)

303 We found municipalities that were highly urbanised, highly connected, and had temperatures  
304 suitable for dengue transmission year-round had a significantly increased odds of an outbreak  
305 (Table 1, Figure 6). Municipalities that had previously experienced outbreaks had around  
306 double the odds of experiencing another compared to municipalities that were still protected  
307 (adjusted odds ratio (aOR): 2.03, 95% credible interval (CI): 1.93, 2.15), supporting the  
308 hypothesis that dengue outbreaks become established once the virus is introduced. We  
309 compared this model to an alternative that only considered whether an outbreak had occurred  
310 in the previous year (rather than any previous year) and found that the model considering  
311 any previous outbreaks performed better according to the model's AIC (any previous year AIC  
312 = 76923.74, year before AIC = 77465.88). Experiencing an outbreak in the previous year did  
313 not have a protective effect due to acquired immunity as hypothesised, the odds of an  
314 outbreak was expected to increase by 18% on average in municipalities the year after an  
315 outbreak occurred (Table S2). Municipalities with year-round temperature suitability had  
316 increased risk of outbreaks, whether we consider suitability for both species of *Aedes*  
317 mosquitoes (Table 1) or just *Aedes aegypti* (Table S2). On average, the odds of an outbreak  
318 increased by 42% (aOR: 1.42, 95% CI: 1.30, 1.55) for every additional month of suitable  
319 temperature per year.

320

321

322

323 **Table 1: Posterior mean and 95% credible interval (CI) estimates for linear effect**  
324 **parameters, shown on the adjusted odds ratio (aOR) scale**

325

| Coefficient                      | aOR (95% CI)      |
|----------------------------------|-------------------|
| Urbanisation                     | 3.26 (2.85, 3.72) |
| REGIC level: metropolis          | 1.39 (1.22, 1.59) |
| REGIC level: regional capital    | 1.52 (1.38, 1.66) |
| REGIC level: sub-regional centre | 1.23 (1.14, 1.33) |
| REGIC level: zone centre         | 1.23 (1.15, 1.31) |
| Prior outbreak: yes              | 2.03 (1.93, 2.15) |
| Months with suitable temperature | 1.42 (1.30, 1.55) |

326 Posterior mean and credible interval estimated taking the 50th, 2.5th and 97.5th quantiles  
327 from the simulated posterior distribution. Urbanisation is the proportion of residents living in  
328 urban areas. REGIC covariates are in comparison to the reference group, local centre. A  
329 suitable temperature is defined as between 16.2° and 34.5°C (suitable for both *Aedes aegypti*  
330 and *Aedes albopictus*).

331

332

333 **Fig 6: The mean and 95% credible interval of the posterior distribution for each model**  
334 **covariate.** Results show that regions with a higher proportion of residents living in urban  
335 areas, in cities with a higher connectivity than local centres, with a higher number of month  
336 suitable for dengue transmission, which had previously experienced an outbreak have  
337 significantly a higher odds of outbreak.

338

339

340 Although higher levels of connectivity had significantly higher odds of an outbreak than local  
341 centres, this difference was highest on average for regional centres (aOR: 1.52, 95% CI: 1.38,  
342 1.66) despite being considered less connected to the urban network than metropolises (aOR:

343 1.39, 95% CI: 1.22, 1.59). This is potentially due to the structure of the urban network which  
344 connects smaller cities to larger centres until they converge to metropolises, meaning that  
345 regional capitals are important intermediate urban centres, that influences wide hinterland  
346 areas (28). Alternatively, despite the regional capitals having similar levels of access to basic  
347 services as metropolises when aggregated to the municipality level (Figure S7), metropolises  
348 have larger economies than regional capitals (28) which may mean improved infrastructure  
349 which is not reflected by census variables on this scale.

350

351 Sensitivity analysis using an outbreak definition of over 100 cases per 100,000 residents  
352 resulted in similar parameter estimates and led to the same conclusions (Table S2). The area  
353 under the ROC curve for the final model was 0.86 (95% confidence interval: 0.856, 0.861,  
354 Figure S9), indicating that the model fit the data well. The temporal smooth function showed  
355 increasing odds of an outbreak over the period not explained by the model covariates (Figure  
356 7a). The spatial smooth field showed that the risk around Rio Branco in Acre, the Centre-West  
357 region, and in Rio Grande do Norte in Northeast Brazil were higher on average than explained  
358 by the model covariates (Figure 7b). In contrast, areas in South Brazil, along the northern  
359 Brazilian coast, and in parts of the Amazon had lower risk of dengue outbreak occurrence  
360 than expected given the covariates.

361

362

363 **Fig 7: Temporal (a) and spatial (b) smooth functions from the final model transformed to**  
364 **show the change in odds.** The odds of an outbreak has increased over the period due to  
365 unexplained factors not included in the model. The spatial random field highlights that more  
366 information is needed in the model to understand the explosive outbreaks that have taken



367 place in Rio Branco, Acre and the Centre-West region as these hotspots are not fully explained  
368 by the model covariates. Pink (green) regions of the map represent areas where the odds of  
369 an outbreak was higher (lower) on average than estimated by the covariates.

370

371

372 The structured residuals for the full model were closer to zero on average for the vast majority  
373 of the country than the baseline model (92.33% of municipalities, Figure 8), indicating that  
374 the covariates are indeed explaining spatio-temporal variation in the data. The inclusion of  
375 climate suitability into the baseline model shrank the structured residuals towards zero for  
376 91.16% of municipalities. This was particularly noticeable in South Brazil (Figure 9a),  
377 supporting the hypothesis that the dengue transmission barrier here was a result of lower  
378 temperatures. The inclusion of the prior outbreak indicator also shrank the structured  
379 residuals towards zero across Brazil (in 94.28% of municipalities, Figure 9b) showing its  
380 relative importance in this model. The relative importance of urbanisation and REGIC levels  
381 of influence were less clear; despite the model finding both these variables significantly  
382 associated with increased odds of an outbreak, there were fewer municipalities in which the  
383 structured residuals had shrank towards (57.5% for urbanisation, Figure 9c, and 45.08% for  
384 REGIC levels of influence, Figure 9d). One potential reason for this is that both variables are  
385 only measured once per decade and therefore do not differ annually; there may be changes  
386 in municipalities that contribute to dengue transmission but are not captured by these  
387 stationary variables. Another potential reason is that these variables are not able to account  
388 for within-city variation at this spatial resolution that may contribute to outbreaks of dengue  
389 (as highlighted by the other socioeconomic variables displayed in Figure S5).

390

391

392 **Fig 8: The median difference between absolute values of the smooth function estimates**  
393 **calculated from the full model and from a baseline model.** A reduction in the absolute  
394 smooth functions (shown in green) indicates that the estimates have shrunk towards zero  
395 when the covariates were added to the model and these covariates are explaining some of  
396 the variability in the data.

397

398

399 **Fig 9: The median difference between absolute values of the smooth function estimates**  
400 **calculated from the full model and models with a) the climate suitability covariate removed,**  
401 **b) the prior outbreak indicator removed, c) the proportion of urbanisation removed, and d)**  
402 **the level of connectivity covariate removed.** A reduction in the absolute estimates of the  
403 smooth functions (shown in green here) indicates that the functions have shrunk towards  
404 zero and the covariate has explained variation in the data.

405

406

407 To understand how the risk of outbreaks have changed over the period, we drew simulations  
408 from the posterior distribution of the response and estimated the probability of an outbreak  
409 for each municipality per year (Figure S10). These estimates were aggregated to the first  
410 (2001 - 2010) and second (2011 - 2020) decade by taking the mean probability for each  
411 municipality per decade to observe how the dengue transmission zone had changed after the  
412 large scale outbreak of the 21st century in 2010. The probability of an outbreak increased  
413 across most of Brazil since the first decade of the 21st century except for the 2 most southern  
414 states and some areas of the Northeast (Figure 10a). The largest increases in risk were seen

415 in the Centre-West, which has been the epicentre of the explosive outbreaks taking place  
416 since 2010. In the regions previously protected from outbreaks (the western Amazon (Figure  
417 10b) and the South (Figure 10c)), the erosion of the geographic barriers can clearly be seen.  
418 Although a southern border still exists, it has shifted south, and the Amazon no longer has a  
419 clear boundary.

420

421

422 **Figure 10: The average probability of an outbreak 2001 - 2010 and 2011 - 2020 in a) Brazil,**  
423 **b) Acre and Amazonas, and c) South Brazil.** The probability of an outbreak estimated using  
424 simulations from the posterior distribution of the response from the final model, averaged  
425 over the first and second decade of the time period. The probability of an outbreak has  
426 increased across most of Brazil. The Amazonian barrier has almost completely been eroded  
427 and the South Brazil border has moved further south.

428

429

430 To determine the current dengue transmission barriers, we identified regions where the  
431 average probability of an outbreak lay below 10% (Figure 11). We chose the threshold 10% as  
432 this gave barriers comparable to those identified in a previous study (6) (Figure S11). The  
433 number of municipalities considered protected declined from 2689 in 2001 - 2010 to 1599 in  
434 2011 - 2020. Between 2011 and 2020 there were no municipalities in the Centre-West region  
435 that were considered protected, compared to 92 in 2001 - 2010. Northeast Brazil was the only  
436 region that had more protected municipalities in 2011 - 2020 than 2001 - 2020 (366 compared  
437 to 315). The southern barrier to dengue transmission now begins in the southern part of  
438 Paraná and extends through the west of Rio Grande do Sul and Santa Catarina. Areas of high

439 altitude in Southeast Brazil, mostly found in Minas Gerais, are still considered protected.  
440 There are still areas of the Amazon protected from dengue outbreaks but this barrier is no  
441 longer clearly defined. In addition to the previously identified barriers in the South region and  
442 Amazon rainforest, we found that there was a protected region along the north coast of Brazil  
443 in northern Pará and Maranhão. This barrier was not explained by the covariates in our model  
444 indicated by the low values of the spatial smooth function (Figure 7b). This area is  
445 predominantly warm and humid climate, with higher precipitation during winter ('Am' type  
446 in Köppen climate classification) (34). Although temperature and humidity are relatively  
447 stable along seasons in this area, the interaction between these variables and increased  
448 precipitation may inhibit the mosquito populations (35).

449

450

451 **Fig 11: Geographical barriers to dengue transmission in a) 2001 - 2010 and b) 2011 - 2020.**

452 Maps showing areas where the probability of an outbreak was less than 10% on average in  
453 each decade of the 21st century. In the second half of the decade, only the 2 most southern  
454 states and the northern coast were fully protected from dengue transmission.

455

## 456 Discussion

457 We found that the expansion of the dengue transmission zone is associated with temperature  
458 suitability, connectivity within the Brazilian urban network and urbanisation, and that these  
459 outbreaks become established in areas after both the vector and the virus have been  
460 introduced. This study builds on previous literature that showed the expansion of dengue  
461 across Brazil (6,7,17,25,36) and has updated the geographical barriers to transmission. The

462 most recent epidemiological bulletins have shown that this expansion has continued in 2021  
463 into previously unaffected parts of Acre, Amazonas, and further south into Paraná and Santa  
464 Catarina (37), highlighting the importance of monitoring the erosion of these barriers. To our  
465 knowledge, this is the first epidemiological modelling study to use the REGIC's levels of  
466 influence and show that there is an increased odds of dengue outbreaks in cities that are  
467 highly connected within the Brazilian urban network. However this increase is not linear;  
468 regional capitals are considered less connected than metropolises but we found that the  
469 increase in odds were higher in these cities. Further investigation is needed to understand  
470 whether this is related to human movement, as people more often travel to regional capitals  
471 from smaller cities than metropolises (28), or differences in socioeconomic factors that we  
472 were unable to detect at the municipality level.

473

474 Although this study focuses on Brazil, there is evidence that similar patterns are emerging in  
475 other parts of South America. In Argentina, previously protected cities in temperate regions  
476 are experiencing regular outbreaks, partially related to increasing temperatures but also as a  
477 result of human movement importing cases from other parts of the continent (22,23). Rural  
478 parts of the Amazon, which were previously isolated from infected hosts and vectors, are also  
479 experiencing outbreaks, thought to be associated with increased connectivity between rural  
480 areas and larger cities (13,17). The introduction of dengue into Acre in the Brazilian Amazon  
481 has been linked to increased connectivity across the state following the construction of a  
482 highway between the two largest cities, Rio Branco and Cruzeiro do Sul (25). The impact of  
483 this connection can be observed in the data as the outbreak appears to jump from Rio Branco  
484 in the south of Acre to Cruzeiro do Sul in the north in 2014 rather than spreading to  
485 neighbouring regions which appears to be the case in the South (Figure 5). The introduction

486 of dengue into the Amazon is particularly worrying as it is the ideal environment for the virus  
487 to thrive: lower than average access to basic services such piped water and refuse collection,  
488 and the ideal climate conditions for large epidemics (17,38).

489

490 Although this study extends our understanding of the expansion of the dengue transmission  
491 zone in Brazil, there are several limitations. Dengue case data used in this study was taken  
492 from Brazil's passive surveillance system, which has been found to differ in accuracy between  
493 regions, and between epidemic and non-epidemic periods (39). To reduce the impact of  
494 reporting bias in our model, we used an outbreak indicator rather than case data as a  
495 response variable. The outbreak indicator used was chosen as it reflects the Brazilian Ministry  
496 of Health's definition (29). However, the threshold of an outbreak is likely to differ across the  
497 country. In regions that historically experienced little or no transmission, even a small number  
498 of cases may be viewed as an outbreak. The choice of such a high threshold is likely to produce  
499 more conservative estimates of the transmission zone. When our results were compared to  
500 a lower outbreak threshold of 100 cases per 100,000 residents, we found the model  
501 parameter estimates were consistent with the higher threshold. The model failed to pick up  
502 some of the temporal trends in the data, which may be a result of using stationary indicators  
503 of urbanisation and connectivity measured every 10 years. Information collected at a finer  
504 temporal scale may provide more insights into the impact of sudden expansions such as the  
505 effect of improved infrastructure in the Amazon (25).

506

507 Our model used the level of influence extracted from the REGIC studies (27,28) to account for  
508 the level of connectivity between cities within Brazil as a proxy for human movement.  
509 However, this indicator may simplify the process and miss important patterns. The

510 hierarchical model assumed by REGIC assumes each small city is linked to a higher level urban  
511 centre, such as the regional capitals and metropolises. It is evident that large and warm cities  
512 may propagate epidemic waves and maintain dengue transmission in their hinterland, while  
513 temperate metropolises in the South (Porto Alegre, Curitiba and São Paulo) do not play a  
514 relevant role in dengue diffusion in their region. Previous studies have found that imported  
515 cases driven by human movement are responsible for dengue outbreaks in temperate cities  
516 (23,24). The choice of spatial connectivity assumption and data can lead to very different  
517 results and the use of the REGIC levels of influence as a spatial covariate rather than including  
518 the direct links may miss some important patterns (26). Future work will aim to incorporate  
519 the complex urban network from the REGIC studies into a statistical framework to account  
520 for direct and indirect links between metropolises and regional capitals, and smaller urban  
521 centres in their hinterland.

522

523 Despite these limitations, we have shown that the expansion of the dengue transmission zone  
524 has continued into the 21st century, driven by increased climate suitability in the South, a  
525 network of highly connected cities, and high levels of urbanisation. The introduction of  
526 dengue outbreaks into an area more than doubles the odds of future outbreaks, which is  
527 particularly concerning given the expansion has continued into 2021. Given the dynamic  
528 nature of the growing dengue burden, the barriers identified here will be outdated very  
529 quickly. We have highlighted the importance of focusing control strategies in areas at risk of  
530 future outbreaks as well as those within the established dengue transmission zone.

531

532

## 533 Acknowledgements

534 SAL was supported by a Royal Society Research Grant for Research Fellows. TE was funded  
535 by the European Union's Horizon 2020 research and innovation programme under grant  
536 agreement No. 856612 and the Cyprus Government. RL was supported by a Royal Society  
537 Dorothy Hodgkin Fellowship.



## 538 References

539

- 540 1. Ten health issues WHO will tackle this year [Internet]. [cited 2021 Jun 10]. Available  
541 from: <https://www.who.int/news-room/spotlight/ten-threats-to-global-health-in-2019>
- 542 2. Wilder-Smith A, Gubler DJ, Weaver SC, Monath TP, Heymann DL, Scott TW. Epidemic  
543 arboviral diseases: priorities for research and public health. *Lancet Infect Dis*. 2017 Mar  
544 1;17(3):e101–6.
- 545 3. Stanaway JD, Shepard DS, Undurraga EA, Halasa YA, Coffeng LE, Brady OJ, et al. The  
546 global burden of dengue: an analysis from the Global Burden of Disease Study 2013.  
547 *Lancet Infect Dis*. 2016 Jun 1;16(6):712–23.
- 548 4. Gubler DJ. Dengue, Urbanization and Globalization: The Unholy Trinity of the 21st  
549 Century. *Trop Med Health*. 2011 Dec;39(4 Suppl):3–11.
- 550 5. Fares RCG, Souza KPR, Añez G, Rios M. Epidemiological Scenario of Dengue in Brazil.  
551 *BioMed Res Int*. 2015 Aug 30;2015:e321873.
- 552 6. Barcellos C, Lowe R. Expansion of the dengue transmission area in Brazil: the role of  
553 climate and cities. *Trop Med Int Health*. 2014;19(2):159–68.
- 554 7. de Azevedo TS, Lorenz C, Chiaravalloti-Neto F. Spatiotemporal evolution of dengue  
555 outbreaks in Brazil. *Trans R Soc Trop Med Hyg*. 2020 Aug 1;114(8):593–602.
- 556 8. Churakov M, Villabona-Arenas CJ, Kraemer MUG, Salje H, Cauchemez S. Spatio-  
557 temporal dynamics of dengue in Brazil: Seasonal travelling waves and determinants of  
558 regional synchrony. *PLoS Negl Trop Dis*. 2019 Apr 22;13(4).
- 559 9. Ferreira-de-Lima VH, Câmara DCP, Honório NA, Lima-Camara TN. The Asian tiger  
560 mosquito in Brazil: Observations on biology and ecological interactions since its first  
561 detection in 1986. *Acta Trop*. 2020 May 1;205:105386.
- 562 10. Ministério da Saúde (BR). Secretaria de Vigilância em Saúde. Departamento de  
563 Vigilância Epidemiológica. Guia de vigilância em saúde: volume único [Internet]. 2019;
- 564 11. Rezende HR, Romano CM, Claro IM, Caleiro GS, Sabino EC, Felix AC, et al. First report of  
565 *Aedes albopictus* infected by Dengue and Zika virus in a rural outbreak in Brazil. *PLOS*  
566 *ONE*. 2020 Mar 12;15(3):e0229847.
- 567 12. Powell JR, Tabachnick WJ. History of domestication and spread of *Aedes aegypti* - A  
568 Review. *Mem Inst Oswaldo Cruz*. 2013 Dec;108(Suppl 1):11–7.
- 569 13. Guagliardo SA, Morrison AC, Barboza JL, Requena E, Astete H, Vazquez-Prokopec G, et  
570 al. River Boats Contribute to the Regional Spread of the Dengue Vector *Aedes aegypti*  
571 in the Peruvian Amazon. *PLoS Negl Trop Dis*. 2015 Apr 10;9(4):e0003648.

- 572 14. Pérez-Castro R, Castellanos JE, Olano VA, Matiz MI, Jaramillo JF, Vargas SL, et al.  
573 Detection of all four dengue serotypes in *Aedes aegypti* female mosquitoes collected in  
574 a rural area in Colombia. *Mem Inst Oswaldo Cruz*. 2016 Apr;111:233–40.
- 575 15. Ayllón T, Câmara DCP, Morone FC, Gonçalves L da S, Barros FSM de, Brasil P, et al.  
576 Dispersion and oviposition of *Aedes albopictus* in a Brazilian slum: Initial evidence of  
577 Asian tiger mosquito domiciliation in urban environments. *PLOS ONE*. 2018 Apr  
578 23;13(4):e0195014.
- 579 16. Kraemer MUG, Reiner RC, Brady OJ, Messina JP, Gilbert M, Pigott DM, et al. Past and  
580 future spread of the arbovirus vectors *Aedes aegypti* and *Aedes albopictus*. *Nat*  
581 *Microbiol*. 2019 May;4(5):854–63.
- 582 17. Lowe R, Lee S, Lana RM, Codeço CT, Castro MC, Pascual M. Emerging arboviruses in the  
583 urbanized Amazon rainforest. *BMJ*. 2020 Nov 13;371:m4385.
- 584 18. Lowe R, Lee SA, O'Reilly KM, Brady OJ, Bastos L, Carrasco-Escobar G, et al. Combined  
585 effects of hydrometeorological hazards and urbanisation on dengue risk in Brazil: a  
586 spatiotemporal modelling study. *Lancet Planet Health*. 2021 Apr 1;5(4):e209–19.
- 587 19. Reinhold JM, Lazzari CR, Lahondère C. Effects of the Environmental Temperature on  
588 *Aedes aegypti* and *Aedes albopictus* Mosquitoes: A Review. *Insects*. 2018 Nov 6;9(4).
- 589 20. Mordecai EA, Cohen JM, Evans MV, Gudapati P, Johnson LR, Lippi CA, et al. Detecting  
590 the impact of temperature on transmission of Zika, dengue, and chikungunya using  
591 mechanistic models. *PLoS Negl Trop Dis*. 2017 Apr 27;11(4):e0005568.
- 592 21. Mordecai EA, Caldwell JM, Grossman MK, Lippi CA, Johnson LR, Neira M, et al. Thermal  
593 biology of mosquito-borne disease. *Ecol Lett*. 2019;22(10):1690–708.
- 594 22. Robert MA, Stewart-Ibarra AM, Estallo EL. Climate change and viral emergence:  
595 evidence from Aedes-borne arboviruses. *Curr Opin Virol*. 2020 Feb 1;40:41–7.
- 596 23. Robert MA, Tinunin DT, Benitez EM, Ludueña-Almeida FF, Romero M, Stewart-Ibarra  
597 AM, et al. Arbovirus emergence in the temperate city of Córdoba, Argentina, 2009–  
598 2018. *Sci Data*. 2019 Nov 21;6(1):276.
- 599 24. Marques-Toledo CA, Bendati MM, Codeço CT, Teixeira MM. Probability of dengue  
600 transmission and propagation in a non-endemic temperate area: conceptual model  
601 and decision risk levels for early alert, prevention and control. *Parasit Vectors*. 2019  
602 Jan 16;12(1):38.
- 603 25. Lana RM, Gomes MF da C, de Lima TFM, Honório NA, Codeço CT. The introduction of  
604 dengue follows transportation infrastructure changes in the state of Acre, Brazil: A  
605 network-based analysis. *PLoS Negl Trop Dis*. 2017 Nov 17;11(11).
- 606 26. Lee SA, Jarvis CI, Edmunds WJ, Economou T, Lowe R. Spatial connectivity in mosquito-  
607 borne disease models: a systematic review of methods and assumptions. *J R Soc*  
608 *Interface*. 18(178):20210096.

- 609 27. Estatística IB de G e. Regiões de influência das cidades 2007. IBGE Rio de Janeiro; 2008.
- 610 28. Estatística IB de G e. Regiões de influência das cidades 2018. IBGE Rio de Janeiro; 2020.
- 611 29. Lowe R, Barcellos C, Coelho CAS, Bailey TC, Coelho GE, Graham R, et al. Dengue outlook  
612 for the World Cup in Brazil: An early warning model framework driven by real-time  
613 seasonal climate forecasts. *Lancet Infect Dis*. 2014;14(7):619–26.
- 614 30. Copernicus Climate Change Service. ERA5-Land monthly averaged data from 2001 to  
615 present [Internet]. ECMWF; 2019 [cited 2021 Jun 4]. Available from:  
616 <https://cds.climate.copernicus.eu/doi/10.24381/cds.68d2bb30>
- 617 31. Baston, Daniel. exactextractr: Fast Extraction from Raster Datasets using Polygons  
618 [Internet]. 2020. Available from: <https://CRAN.R-project.org/package=exactextractr>
- 619 32. IBGE. Arranjos populacionais e concentrações urbanas no Brasil. IBGE Rio de Janeiro;  
620 2016.
- 621 33. Wood SN. Generalized additive models: an introduction with R. CRC press; 2017.
- 622 34. Alvares CA, Stape JL, Sentelhas PC, de Moraes Gonçalves JL, Sparovek G. Köppen's  
623 climate classification map for Brazil. *Meteorol Z*. 2013 Dec 1;711–28.
- 624 35. Pliego Pliego E, Velázquez-Castro J, Fraguera Collar A. Seasonality on the life cycle of  
625 *Aedes aegypti* mosquito and its statistical relation with dengue outbreaks. *Appl Math*  
626 *Model*. 2017 Oct 1;50:484–96.
- 627 36. Castro MC, Baeza A, Codeço CT, Cucunubá ZM, Dal'Asta AP, Leo GAD, et al.  
628 Development, environmental degradation, and disease spread in the Brazilian Amazon.  
629 *PLOS Biol*. 2019 Nov 15;17(11):e3000526.
- 630 37. Secretaria de Vigilância em Saúde. Boletim Epidemiológico - Monitoramento dos casos  
631 de arboviroses urbanas causados por vírus transmitidos pelo mosquito *Aedes* (dengue,  
632 chikungunya e zika), semanas epidemiológicas 1 a 21, 2021 [Internet]. Ministério da  
633 Saúde; 2021. Available from: [https://www.gov.br/saude/pt-](https://www.gov.br/saude/pt-br/media/pdf/2021/junho/07/boletim_epidemiologico_svs_21.pdf)  
634 [br/media/pdf/2021/junho/07/boletim\\_epidemiologico\\_svs\\_21.pdf](https://www.gov.br/saude/pt-br/media/pdf/2021/junho/07/boletim_epidemiologico_svs_21.pdf)
- 635 38. Huber JH, Childs ML, Caldwell JM, Mordecai EA. Seasonal temperature variation  
636 influences climate suitability for dengue, chikungunya, and Zika transmission. Althouse  
637 B, editor. *PLoS Negl Trop Dis*. 2018 May 10;12(5):e0006451.
- 638 39. Silva MMO, Rodrigues MS, Paploski IAD, Kikuti M, Kasper AM, Cruz JS, et al. Accuracy of  
639 Dengue Reporting by National Surveillance System, Brazil. *Emerg Infect Dis*. 2016  
640 Feb;22(2):336–9.

641

642

## 643 Supporting information captions

644

645 **S1 Document: Methods and materials.** Additional information about methods and  
646 materials used in this study.

647

648

649 **S2 Document: Portuguese translation of the abstract**

650

651

652 **Fig S1: The organisation of Brazil into a) 5 geo-political regions, and b) 27 federal units.**

653 Abbreviations: AC = Acre, AL = Alagoas, AP = Amapá, AM = Amazonas, BA = Bahia, CE =  
654 Ceará, DF = Distrito Federal, ES = Espírito Santo, GO = Goiás, MA = Maranhão, MT = Mato  
655 Grosso, MS = Mato Grosso do Sul, MG = Minas Gerais, PA = Pará, PB = Paraíba, PR = Paraná,  
656 PR = Pernambuco, PI = Piauí, RJ = Rio de Janeiro, RN = Rio Grande do Norte, RS = Rio Grande  
657 do Sul, RO = Rondônia, RR = Roraima, SC = Santa Catarina, SP = São Paulo, SE = Sergipe, TO =  
658 Tocantins.

659

660

661 **Fig S2: Average monthly mean temperature (°C) in each Brazilian state January 2001 -**  
662 **December 2020.**

663

664

665 **Fig S3: The average number of months suitable for dengue transmission per year a) 2001 -**  
666 **2010, and b) 2011 - 2020.** The average number of months with mean temperature between  
667 16.2 and 34.5°C aggregated to the two decades of data. Most of Brazil experiences suitable  
668 temperatures year-round apart from areas of South Brazil and areas of high altitude in the  
669 Southeast which experience cool winters.

670

671

672 **Fig S4: The percentage of residents living in urban areas of each municipality from the**  
673 **2000 (a) and 2010 (b) censuses.** Levels of urbanisation differ greatly across Brazil, with the  
674 majority of Southeast and South Brazil living in urban areas in comparison to the North and  
675 Northeast which has a larger rural population.

676

677

678 **Fig S5: Scatterplot comparing the percentage of residents with access to piped water (top)**  
679 **and refuse collection (bottom) to the percentage living in urban areas from the 2010**  
680 **census.** Access to basic services was highly correlated to the level of urbanisation: highly  
681 urban areas had highest access to piped water and refuse collection.

682

683

684 **Fig S6: The proportion of cities in each region at each level of influence in the a) 2007 and**  
685 **b) 2018 REGIC study.** The proportion of high-level cities has increased across the country  
686 but the North and Northeast still have noticeably less well-connected cities than other  
687 regions. The Southeast and South are by far the most connected regions.

688

689

690 **Fig S7: Raincloud plots exploring the relationship between REGIC level of influence and a)**  
691 **urbanisation, b) access to piped water, and c) refuse collection.** Metropoles and regional  
692 capitals have higher levels of urbanisation and access to basic services than municipalities  
693 that had lower levels of connectivity within the urban network. Local centres were more  
694 varied in terms of basic services and urban levels than the other levels and covered a wide  
695 range of city types.

696  
697  
698 **Fig S8: The proportion of municipalities in each region of Brazil experiencing an outbreak**  
699 **per year 2001 - 2020.** The proportion of municipalities affected by outbreak has increased  
700 since 2010 in every region of the country, although outbreaks in South Brazil are still  
701 focused on a small part of the region.

702  
703  
704 **Fig S9: Receiver operating characteristic (ROC) curve for the final model (solid line)**  
705 **compared to chance (dashed line).** The closer to the top-left corner, the better the  
706 predictive ability of a model. As the ROC curve lies above the dashed reference line, this  
707 model performs better than chance.

708  
709  
710 **Fig S10: The probability of an outbreak estimated from the model for each year 2001 -**  
711 **2020.** The mean probability of an outbreak estimated by taking 1000 simulations from the  
712 posterior distribution of the response and transforming the outcome using a probit  
713 function.

714  
715  
716 **Fig S11: Comparison of different risk thresholds to define current geographical barriers to**  
717 **dengue outbreaks.** Municipalities were considered 'protected' if the probability of an  
718 outbreak was less than or equal to the threshold a) 0%, b) 5%, c) 10% or d) 15%. The  
719 threshold of 10% was chosen as it was the most comparable with previous studies.

720  
721  
722 **Table S1: Distribution of municipalities at each level of influence in the urban network,**  
723 **2007 (1) and 2018 (2).** The number of municipalities classified as metropoles (largest cities  
724 in Brazil, connected throughout the entire country), regional capitals (large cities connected  
725 regionally and to metropoles), sub-regional capitals (cities connected locally and to the  
726 three largest metropoles), zone centres (smaller cities generally connected only to their  
727 neighbours), and local centres (smallest cities typically disconnected from the urban  
728 network).

729  
730  
731 **Table S2: Posterior mean and 95% credible interval (CI) estimates for linear effect**  
732 **parameters, calculated using an outbreak threshold of 100 cases per 100,000 residents,**  
733 **shown on the adjusted odds ratio (aOR) scale.**

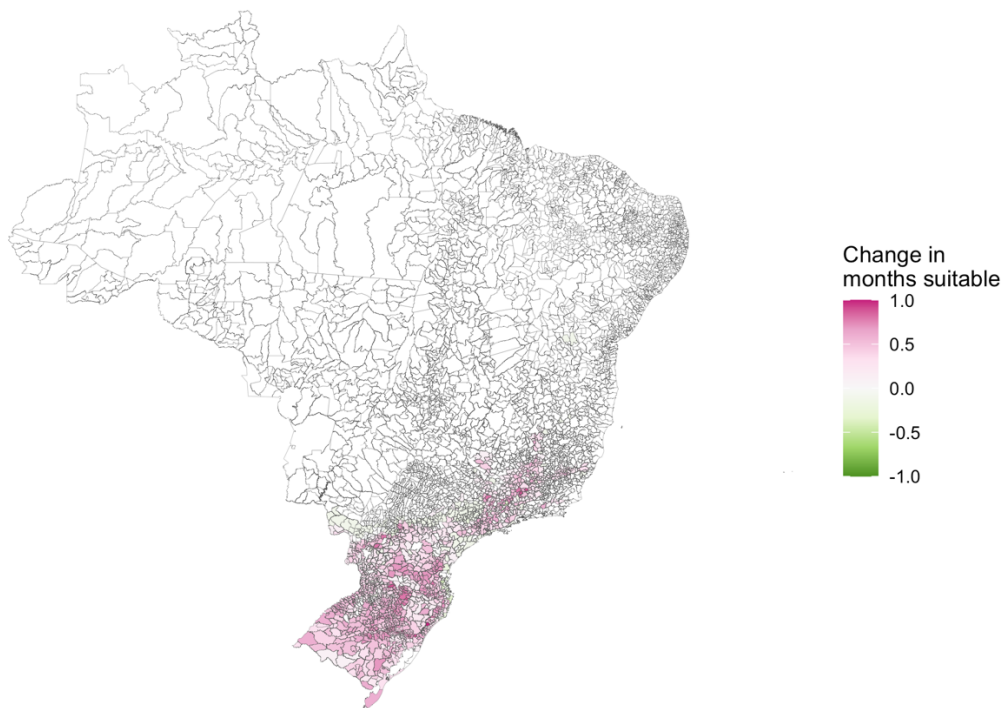

**Fig 1: The difference between the average number of months with suitable temperatures for dengue transmission in 2001 - 2010 and 2011 - 2020.** The number of months with temperatures between 16.2 and 34.5°C has increased on average (shown in pink) in parts of South and Southeast Brazil which were previously considered 'protected' from dengue transmission.

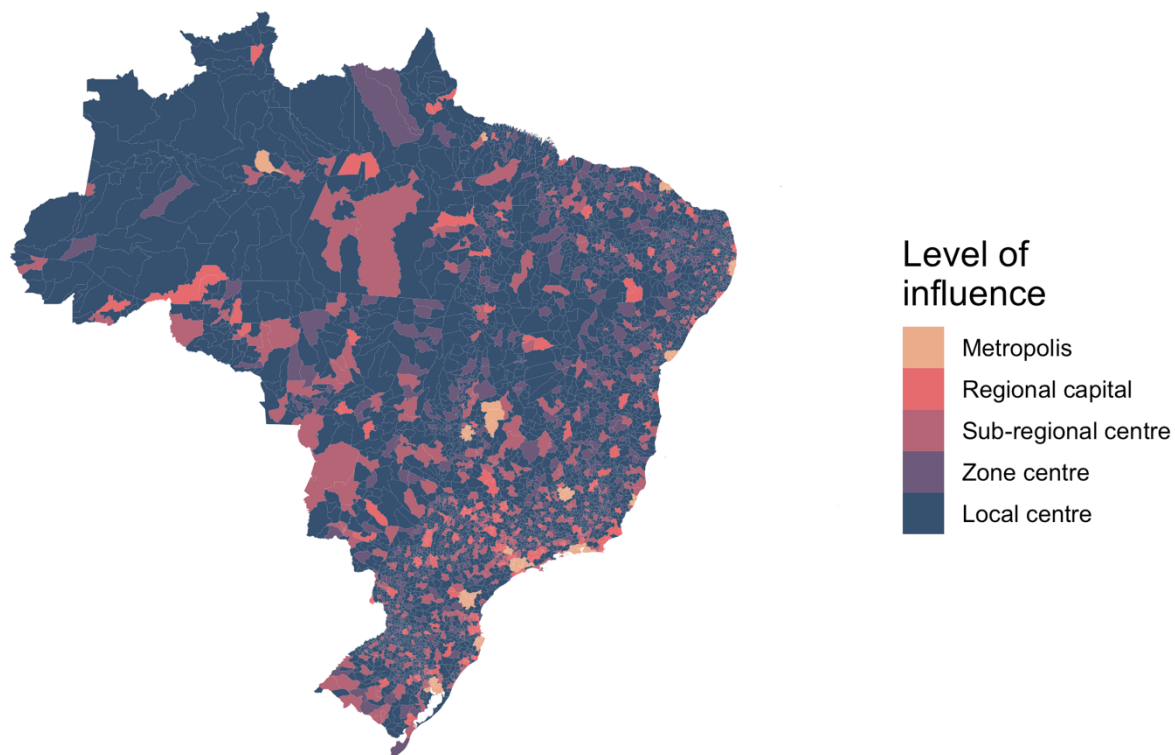

**Fig 2: The level of influence of cities within the Brazilian urban network from REGIC 2018.** The Amazon region is far less connected to the urban network than the rest of the country. As there is only one metropolis in North Brazil, people often travel great distances, far greater than in other regions, to reach cities.

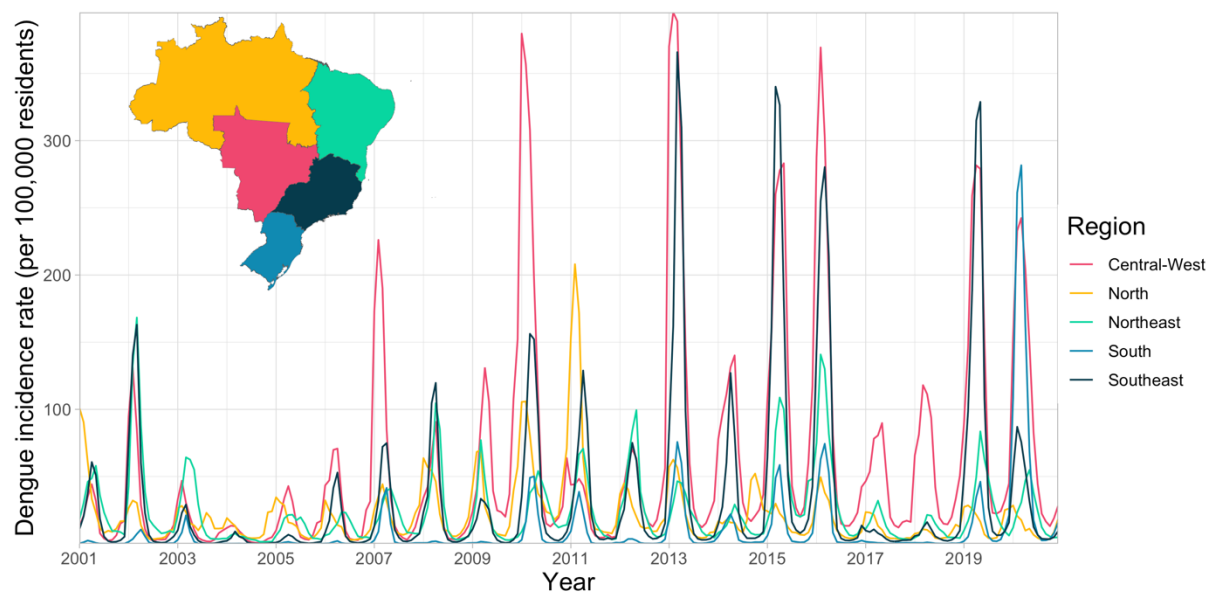

**Fig 3: Monthly incidence rate per 100,000 residents in regions of Brazil 2001 - 2020.**

Incidence rates have increased in every region of the country across the 21st century. The first regional outbreak occurred in 2010, outbreaks have occurred more frequently and in more regions since then.



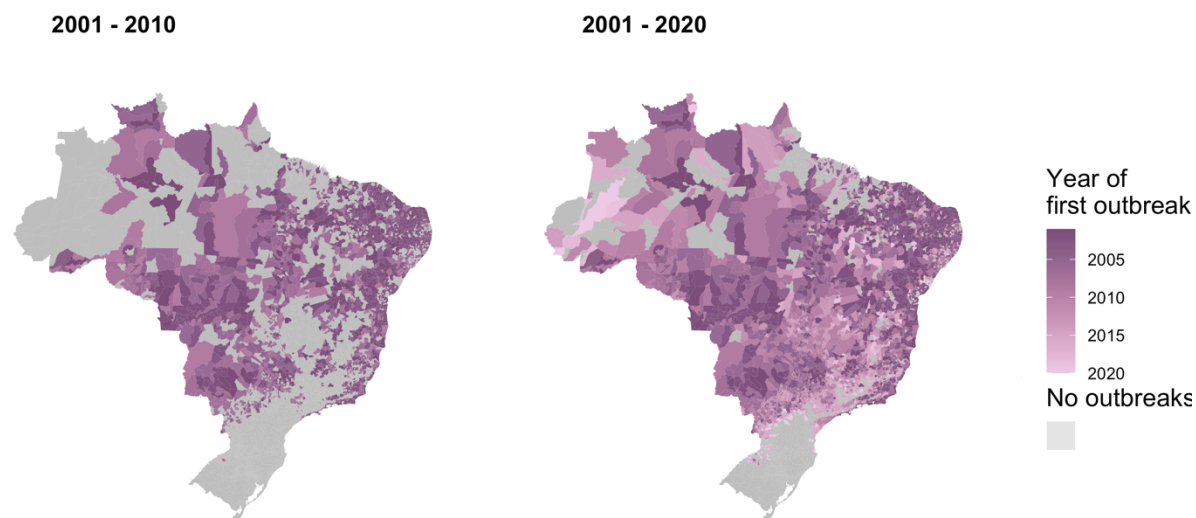

**Fig 4: The first year each municipality experienced an outbreak for the first time in the period 2001 - 2010 and 2001 - 2020.** The year each municipality first recorded over 300 cases per 100,000 residents. Recent data shows the previous barriers to dengue outbreaks in the Amazon and South are being eroded.

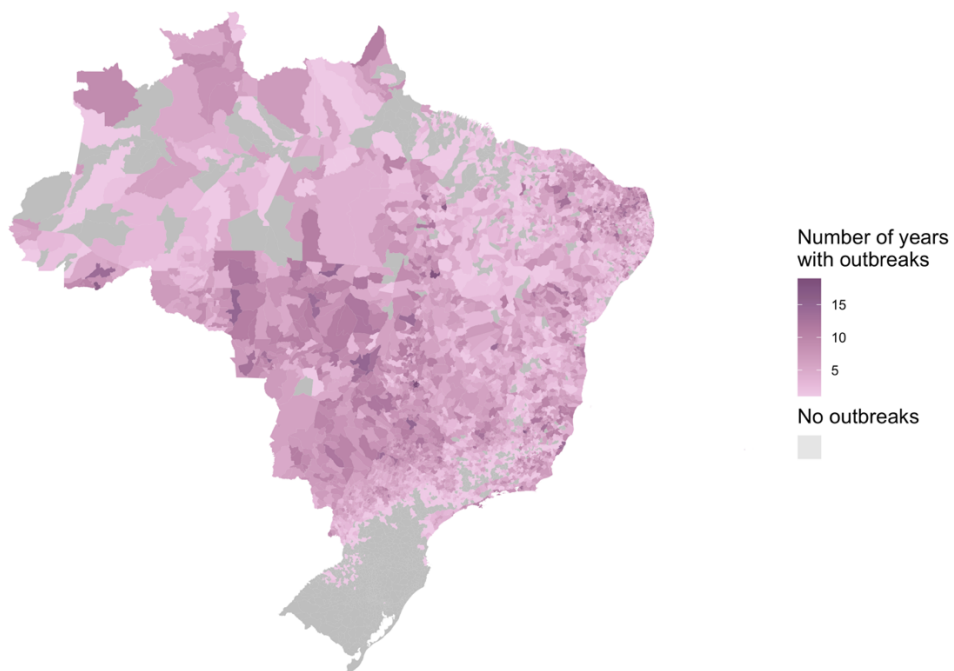

**Fig 5: The number of years each municipality experienced an outbreak between 2001 and 2020.** Municipalities that experienced outbreaks earlier in the 21st century continued to experience outbreaks throughout the period. This suggests that once dengue is introduced to a region, it becomes established.

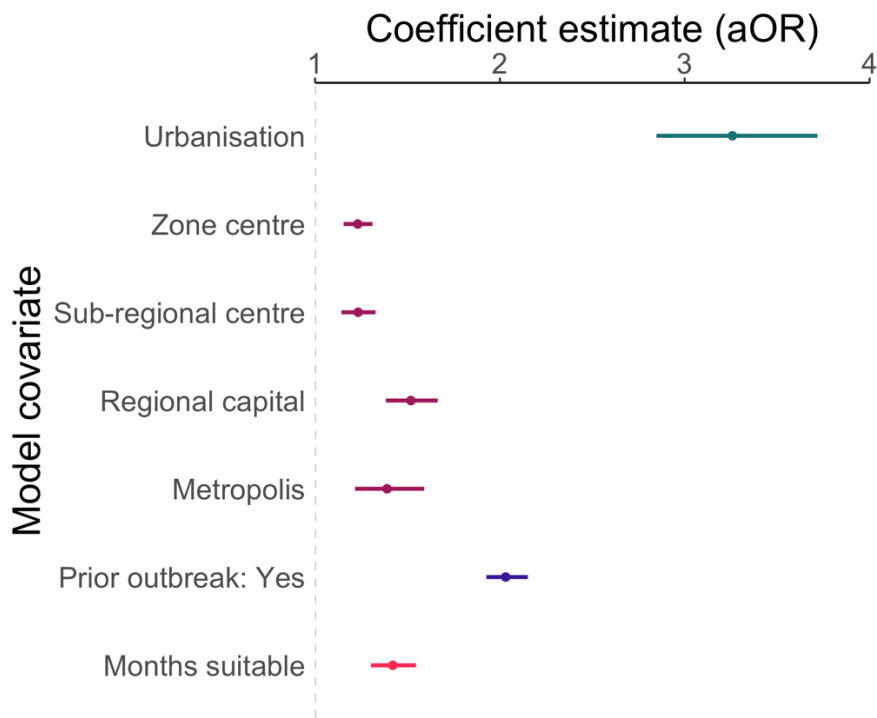

**Fig 6: The mean and 95% credible interval of the posterior distribution for each model covariate.** Results show that regions with a higher proportion of residents living in urban areas, in cities with a higher connectivity than local centres, with a higher number of month suitable for dengue transmission, which had previously experienced an outbreak have a significantly higher odds of outbreak.

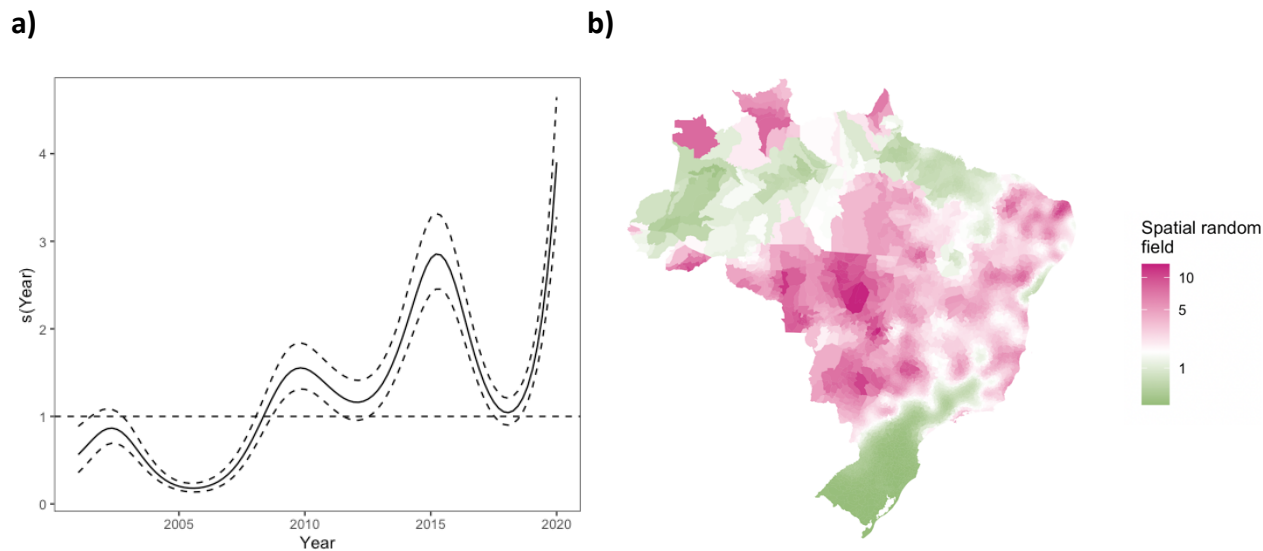

**Fig 7: Temporal (a) and spatial (b) smooth functions from the final model transformed to show the change in odds.** The odds of an outbreak has increased over the period due to unexplained factors not included in the model. The spatial random field highlights that more information is needed in the model to understand the explosive outbreaks that have taken place in Rio Branco, Acre and the Centre-West region as these hotspots are not fully explained by the model covariates. Pink (green) regions of the map represent areas where the odds of an outbreak was higher (lower) on average than estimated by the covariates.

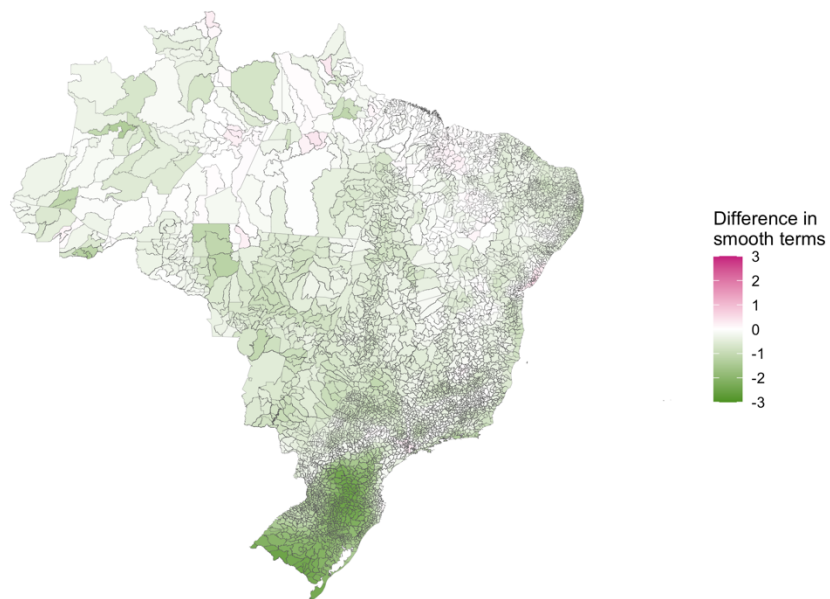

**Fig 8: The median difference between absolute values of the smooth function estimates calculated from the full model and from a baseline model.** A reduction in the absolute smooth functions (shown in green) indicates that the estimates have shrunk towards zero when the covariates were added to the model and these covariates are explaining some of the variability in the data.

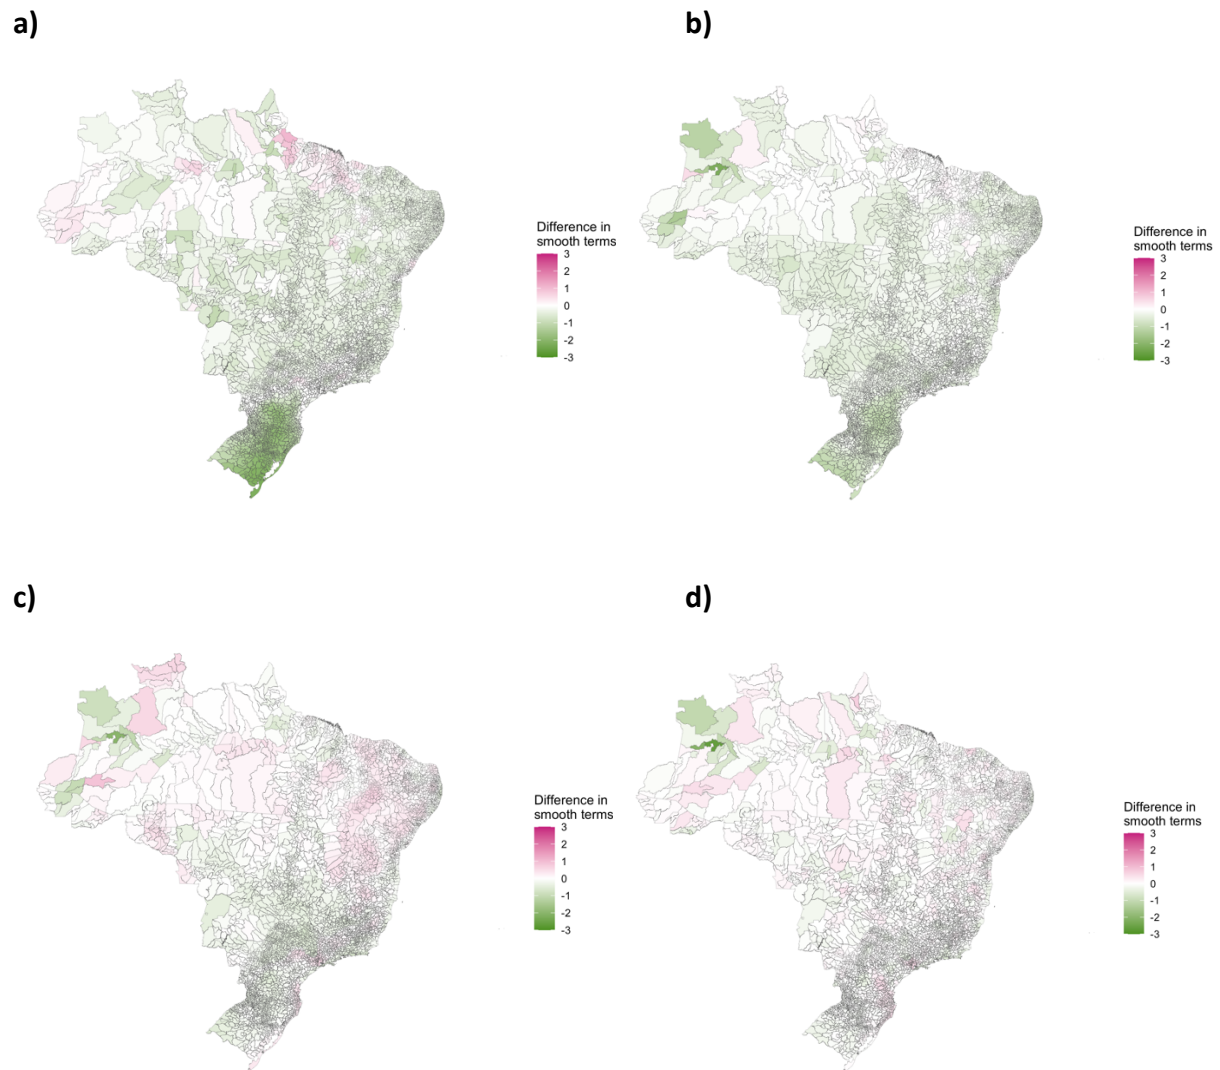

**Fig 9: The median difference between absolute values of the smooth function estimates calculated from the full model and models with a) the climate suitability covariate removed, b) the prior outbreak indicator removed, c) the proportion of urbanisation removed, and d) the level of connectivity covariate removed. A reduction in the absolute estimates of the smooth functions (shown in green here) indicates that the functions have shrunk towards zero and the covariate has explained variation in the data.**

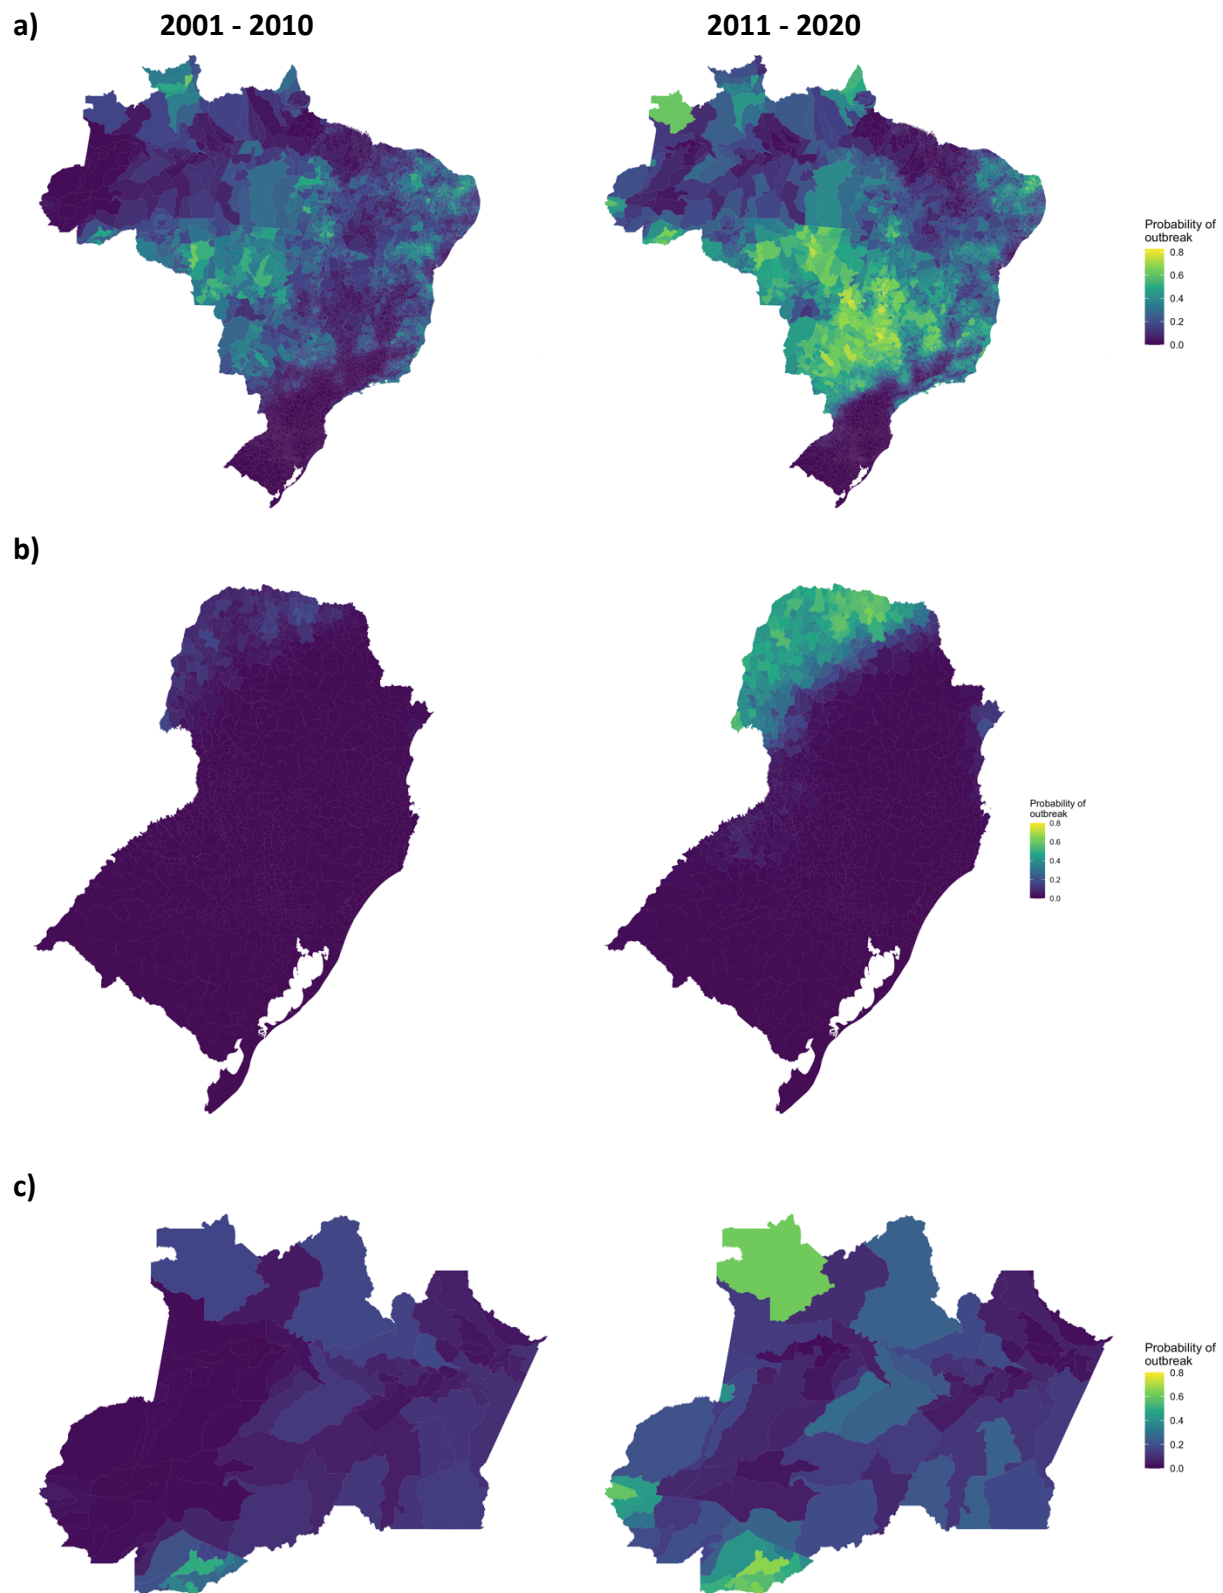

**Figure 10: The average probability of an outbreak 2001 - 2010 and 2011 - 2020 in a) Brazil, b) Acre and Amazonas, and c) South Brazil. The probability of an outbreak estimated using simulations from the posterior distribution of the response from the final model, averaged over the first and second decade of the time period. The probability of an**

**outbreak has increased across most of Brazil. The Amazonian barrier has almost completely been eroded and the South Brazil border has moved further south.**



2001 - 2010

2011 - 2020

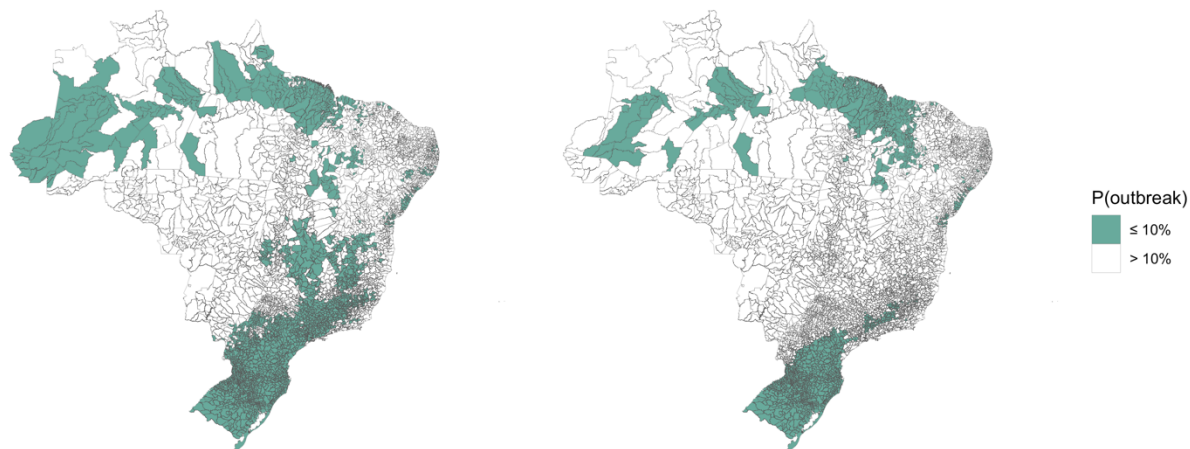

**Fig 11: Geographical barriers to dengue transmission in a) 2001 - 2010 and b) 2011 - 2020.** Maps showing areas where the probability of an outbreak was less than 10% on average in each decade of the 21st century. In the second half of the decade, only the 2 most southern states and the northern coast were fully protected from dengue transmission.
